# Supplementary material
Source: Springer Nature journal article supplement (https://www.springermedizin.de/resource/supplementary/12958_2011_820_MOESM4_ESM.pdf/9568926)

Overview

Mucosal fold

Basal gland

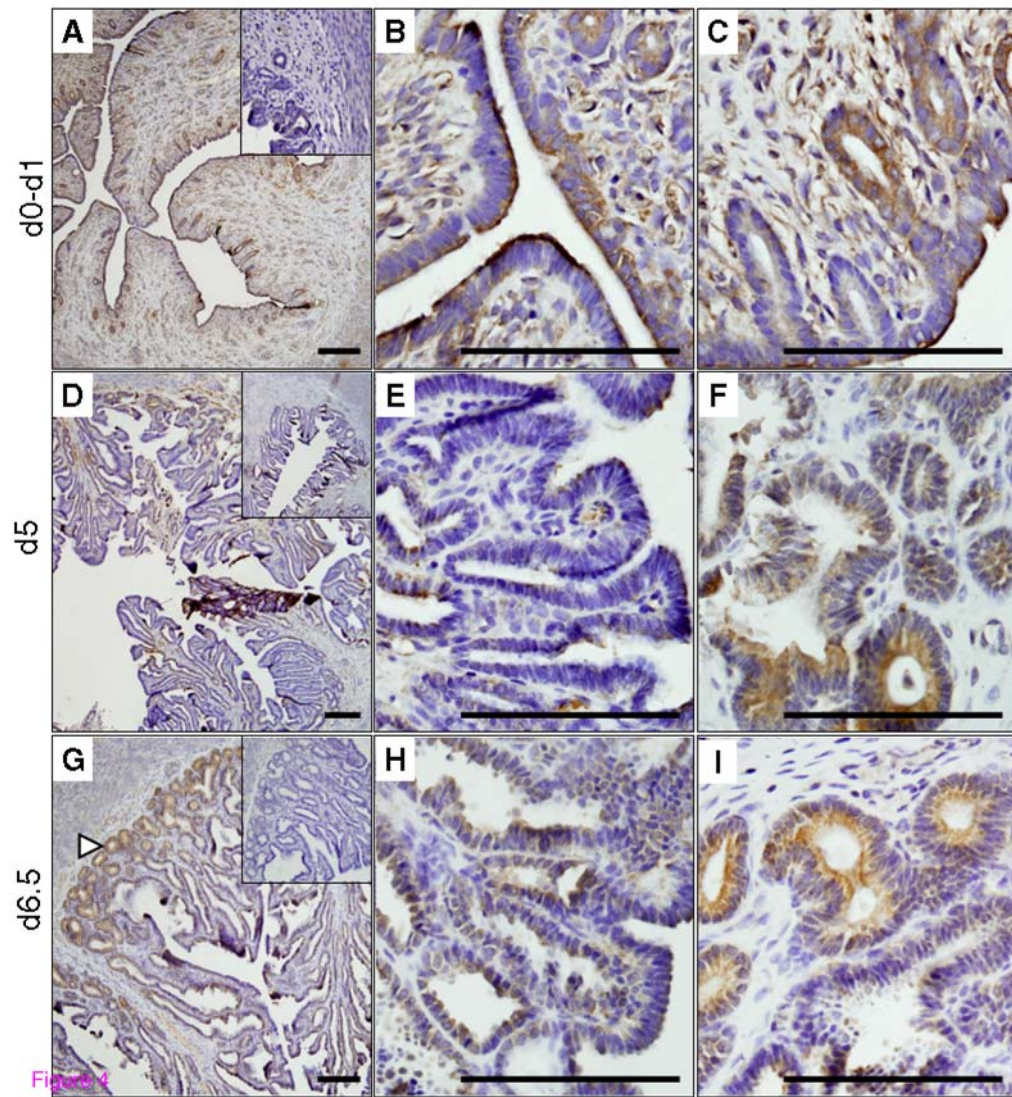

Figure 4

Supplement: MOESM4 [file 9568926]
